# Supplementary material for: Spatial and temporal localization of immune transcripts defines hallmarks and diversity in the tuberculosis granuloma
Source: PubMed Central journal article supplement (PMC6479067; doi:10.1038/s41467-019-09816-4), 2019-04-23
Supplement: 41467_2019_9816_MOESM1_ESM.pdf [file 41467_2019_9816_MOESM1_ESM.pdf]

## Supplementary Information

Spatial and temporal localization of immune transcripts defines hallmarks  
and diversity in the tuberculosis granuloma

*Carow et al.*

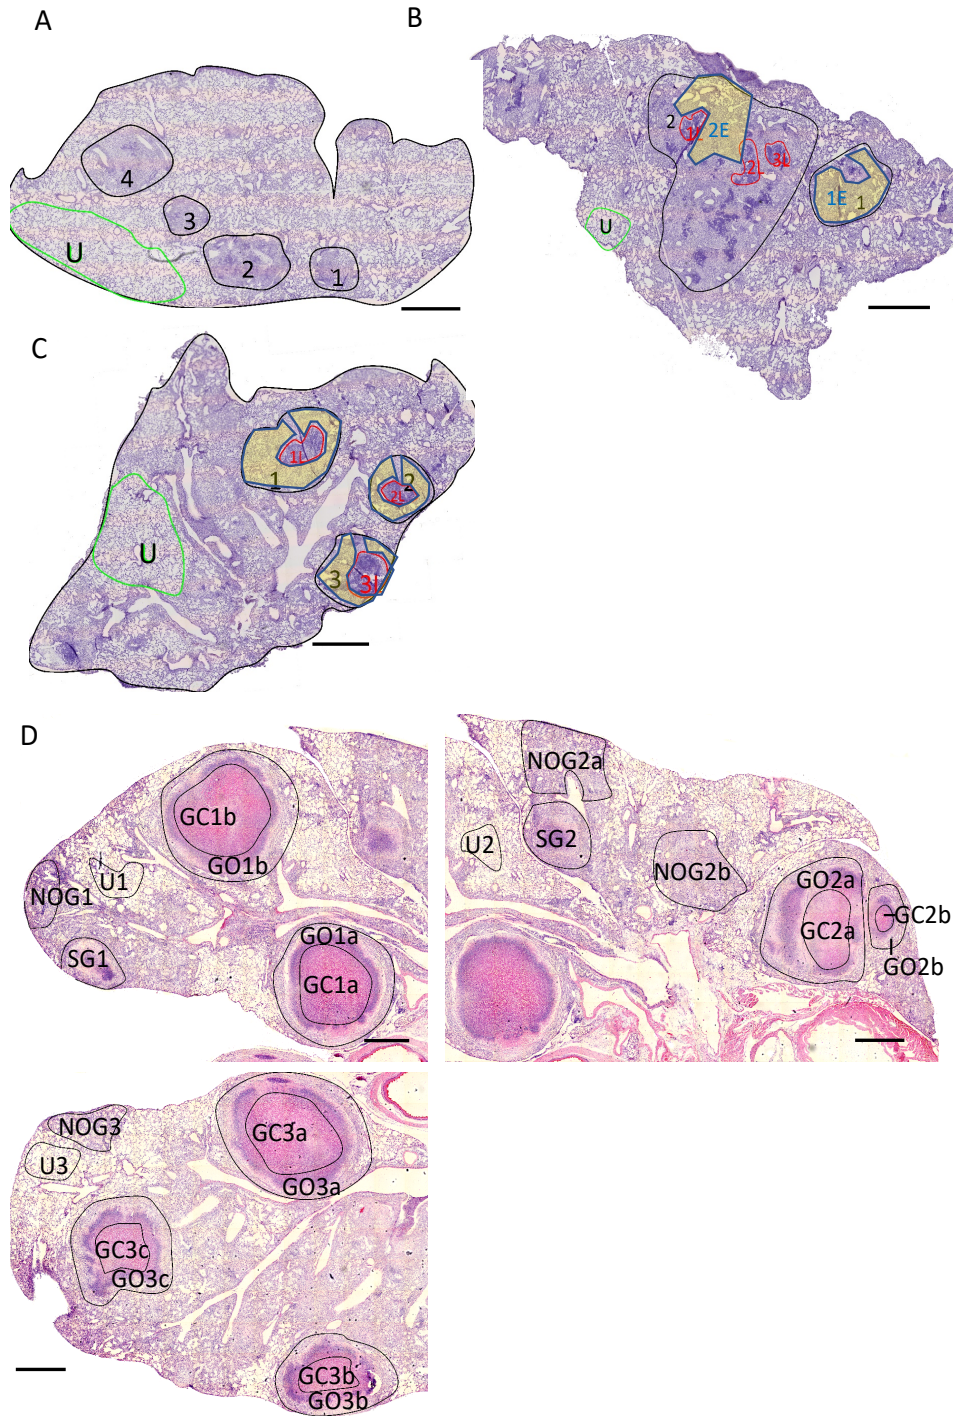

Supplementary Figure 1

*Histological features of analyzed tissue sections*

H&E stained sections from lung lobes from C57Bl/6 mice at 3 (A), 8 (B), 12 (C) wpi. In D, a section from C3HeB/FeJ mice 10 weeks after infection are shown. Areas that are marked were found and analyzed throughout the paper for all three consecutive sections. The areas occupied by lesions are marked and numbered in black. Unaffected

areas for all lungs are marked in green. In B and C, the lymphoid rich areas are marked in red and epitheloid areas shaded in yellow.

In D encapsulated granulomas and non-encapsulated lesions can be observed in three regions of a C3HeB/FeJ lung. U: unaffected area; GC: granuloma center; GO: granuloma outline; NOG: non-organized granuloma and SG: small necrotic granuloma. Scale bar: 1000  $\mu\text{m}$ .

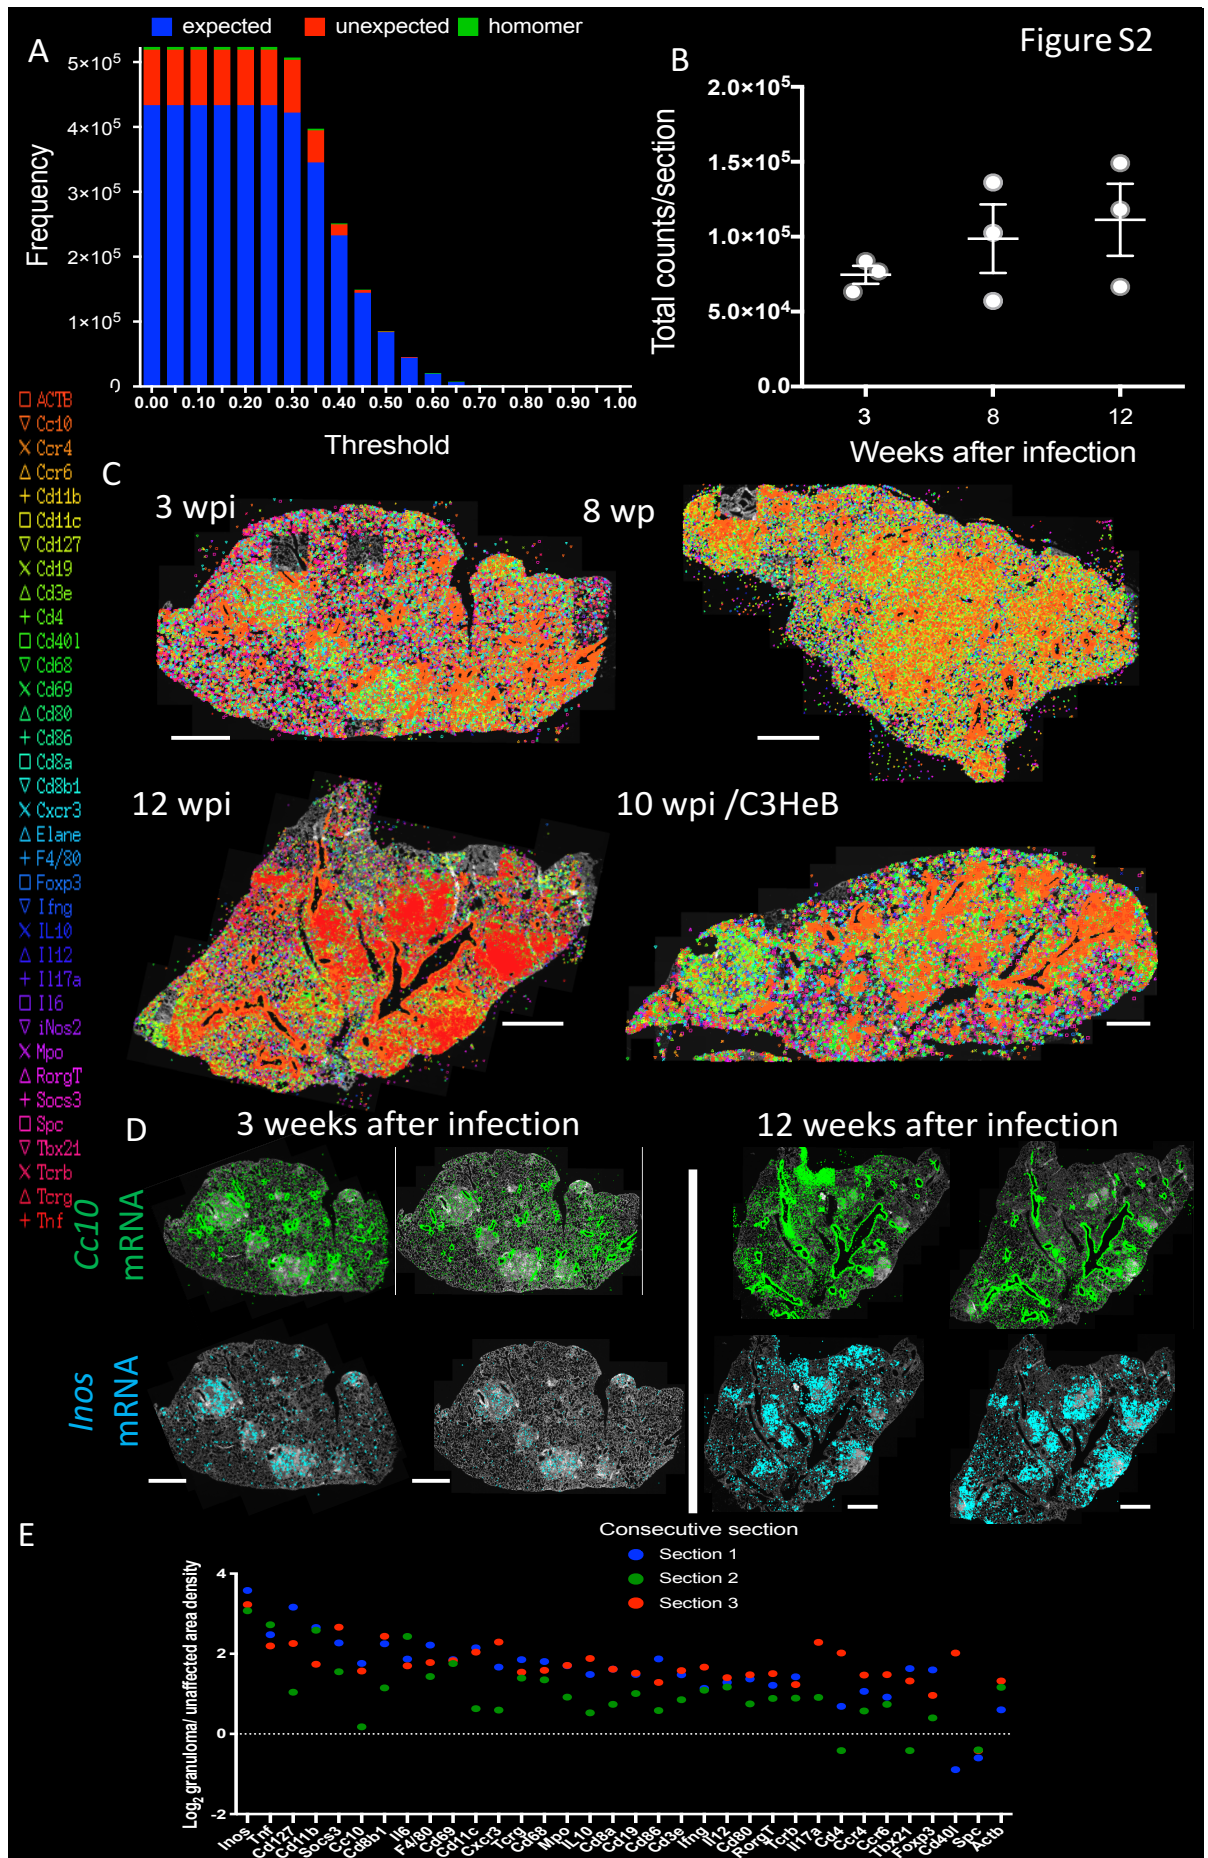

## Supplementary Figure 2

### *Specificity and reproducibility of the in situ sequencing*

- A. The density of all barcoded sequences in relation to unexpected and homomers (unspecific) reads in each area at different signal intensity thresholds are depicted. The unexpected barcodes showed lower scores than true expected barcodes, and could thus be excluded from further analysis by setting a cut-off at a fixed threshold (0.45).
- B. The mean  $\pm$  SEM of the total number of amplified sequences per section in the different sections analysed are shown.
- C. Raw data showing the location of all decoded sequences in paraformaldehyde-fixed lung sections from *M. tuberculosis* infected mice obtained at the indicated time points after infection. Each dot represents one decoded sequence. The sequences are aligned against a DAPI staining. Note the differential localization of sequences. Scale bar: 1000  $\mu$ m.
- D. Raw data showing the location of *Cc10* and *Inos* decoded transcripts called from two consecutive lung sections from a *M. tuberculosis*-infected mouse obtained at the indicated time points after infection. Each dot represents one decoded sequence. The sequences are aligned against a DAPI staining. Note the differential localization of both sequences and the similarity of consecutive images. Scale bar: 1000  $\mu$ m
- E. The relative fold increase in the density of individual sequences in granuloma vs unaffected lung areas from consecutive lung sections at 3 wpi are shown. A dotted line indicates the mean relative density of *Actb* mRNA. We have excluded from this graph transcripts showing either no signals in the unaffected areas or those in which more than 2 different areas showed no signals. Source data are provided as a Source Data file.

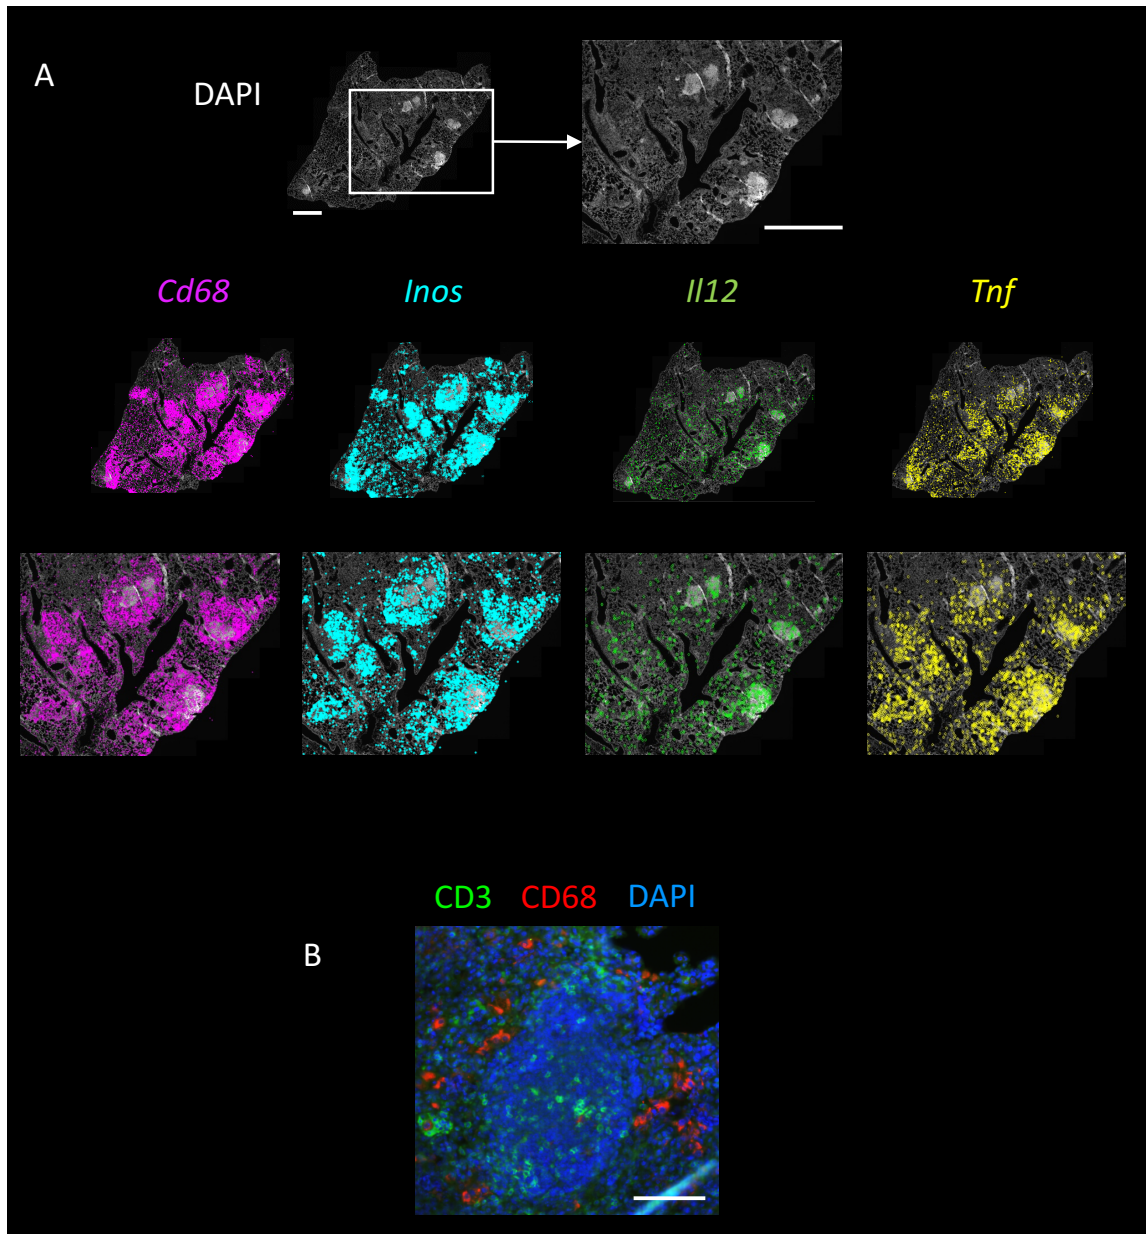

Supplementary Figure 3

*Spatial distribution of myeloid transcripts in lungs from M. tuberculosis-infected mice*

- A. The raw signals for *Tnf*, *Inos*, *Il12* and *Cd68* (A) mRNAs in lungs from *M. tuberculosis* infected mice. Note in A that while *Inos* and *Cd68* sequences overlap, this is not the case for *Cd68* and *Il12* transcripts which locate in different areas of the granuloma, better shown in the zoomed area. Scale: 1000  $\mu$ m
- B. Double immunolabelling for CD3 and CD68 in DAPI stained C57BL/6 lung section 12 wpi with *M. tuberculosis*. A representative micrograph from 3 independent samples is shown. Scale: 100  $\mu$ m

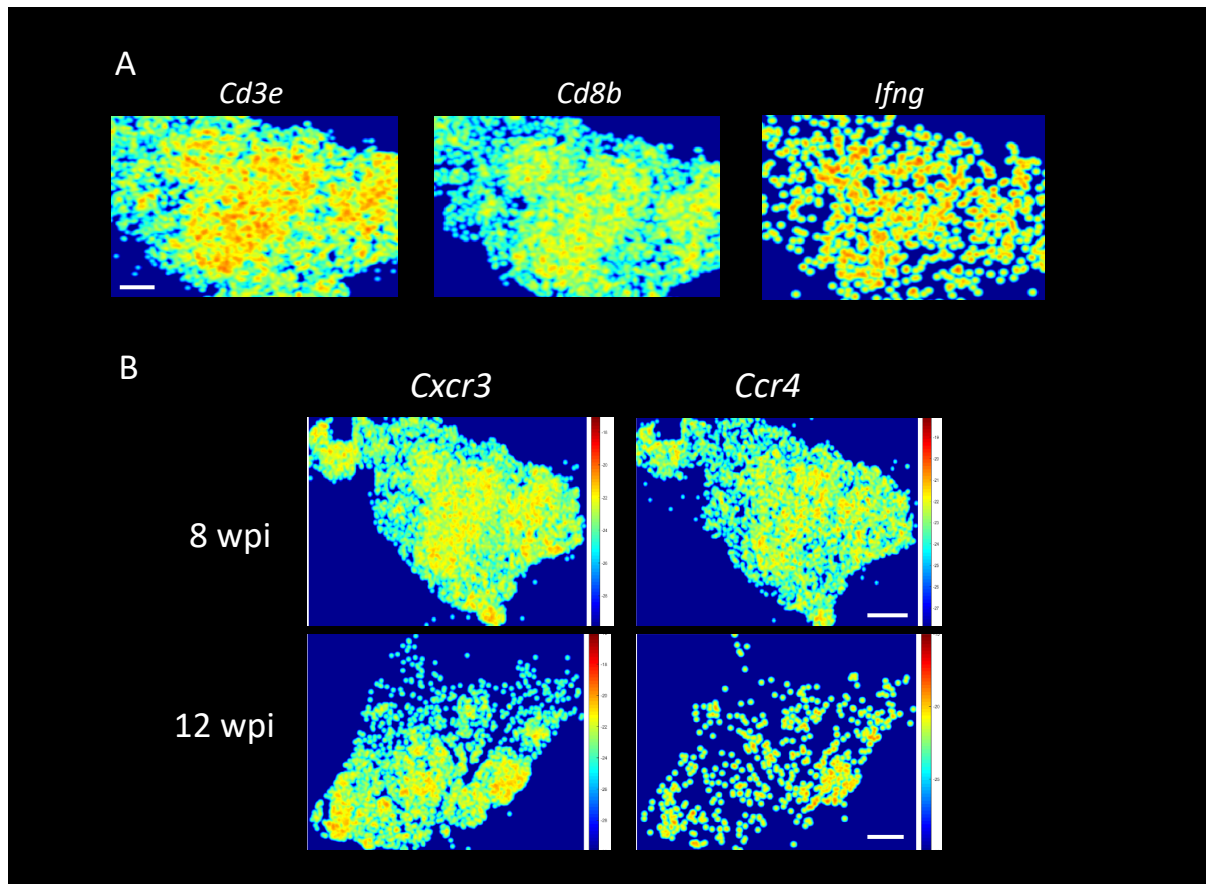

Supplementary Figure 4

*Spatial distribution of lymphoid transcripts in lungs from M. tuberculosis-infected mice*

A. Pseudocolor log<sub>2</sub> density plots of *Cd3e*, *Cd8b* and *Ifng* mRNA for one representative lung at 8 wpi. Scale: 1000 μm

B. Density plot of *Cxcr3* and *Ccr4* sequences in lungs at 8 and 12 wpi. Scale bar: 1000 μm.

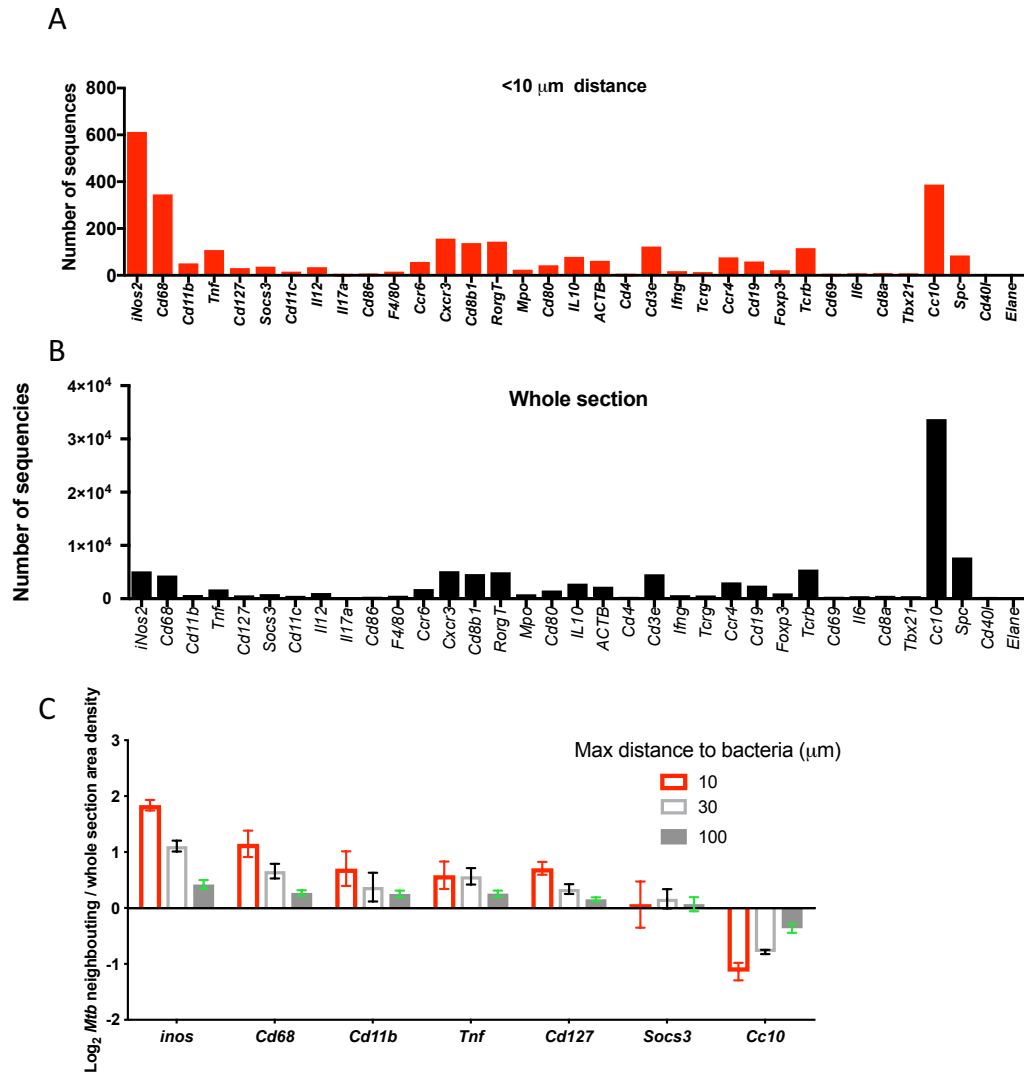

Supplementary Figure 5

*Identification of sequences expressed at different distances from M. tuberculosis in the lung*

- The transcript counts for each sequence located at <10 μm from *M. tuberculosis*.
- The transcript counts for each sequence in the whole area of the section in (A) are depicted.
- The frequency of selected transcripts located at <10, 30 or 100 μm from *M. tuberculosis* bacteria in relation to the total sequence count for each distance was determined. The fold increase of such frequencies was compared to the



frequencies of each sequence in the whole section. The mean fold increase at each distance vs the whole section of 7 selected transcripts  $\pm$  SEM of in 3 consecutive sections is depicted. Source data are provided as a Source Data file.

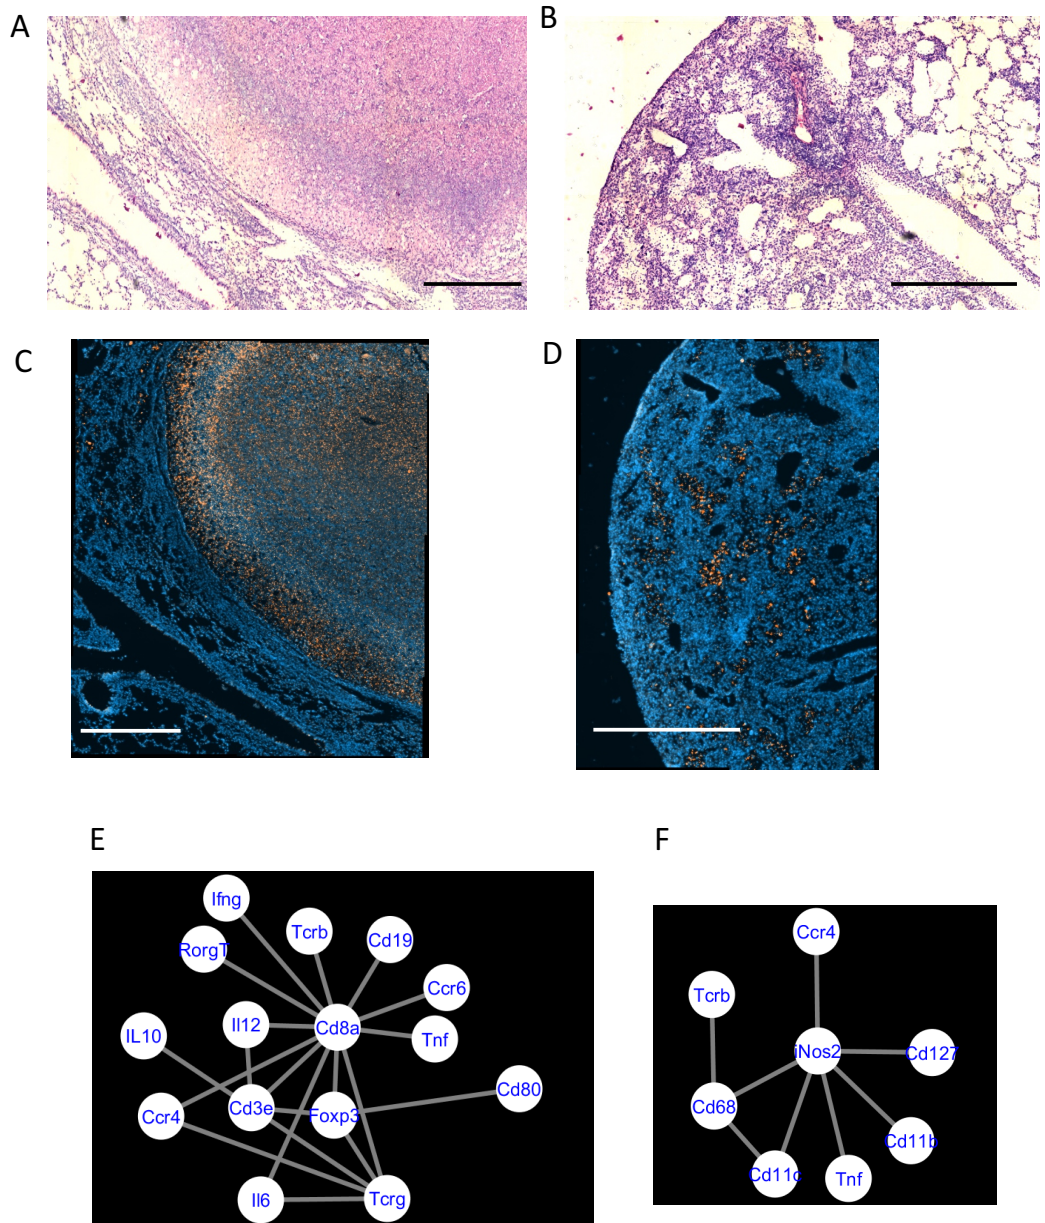

Supplementary Figure 6

*In situ sequencing of the encapsulated granulomas*

A-B. Micrograph showing the rim area from a necrotic encapsulated granuloma, showing the presence of a capsule, surrounding a layer of epitheloid and foamy cells and delineating compressed lung parenchyma and epitheloid and lymphoid cells (A). Area showing a perivascular lesion with numerous lymphocytes and epitheloid cells in the same H& E stained section from a C3HeB/FeJ lung (B). Scale bar: 500  $\mu$ m.

C-D. Auramine-Rhodamine staining of C3HeB/FeJ encapsulated (C) and non-encapsulated lesions (D). Note bacteria localizes in the rim of the encapsulated lesion. Scale bar: 500  $\mu\text{m}$ .

E-F. The networks of co-expressed transcripts in an encapsulated granuloma (E) and non-encapsulated cellular granuloma (F) are shown.

## Supplementary tables

### Supplementary Table 1

*Counts and statistical analysis of paired sequence combinations*

| <b>Sequences</b>  | <b>RIL count-<br/>section 1</b> | <b>p value<br/>RIL<br/>section 1</b> | <b>RIL count<br/>section 2</b> | <b>p value<br/>RIL<br/>section 2</b> |
|-------------------|---------------------------------|--------------------------------------|--------------------------------|--------------------------------------|
| <i>Ccr6-Cd19</i>  | 105                             | 0                                    | 302                            | 0                                    |
| <i>Ccr6-Cd3e</i>  | 61                              | 0                                    | 126                            | 0                                    |
| <i>Ccr6-Cd68</i>  | 45                              | 8,63E-05                             | 99                             | 2,36E-07                             |
| <i>Ccr6-Cxcr3</i> | 16                              | 5,46E-05                             | 30                             | 1,11E-16                             |
| <i>Ccr6-IL10</i>  | 9                               | 1,89E-09                             | 43                             | 0                                    |
| <i>Ccr6-Il12</i>  | 14                              | 8,88E-16                             | 22                             | 0                                    |
| <i>Ccr6-RorgT</i> | 20                              | 3,65E-08                             | 56                             | 5,77E-15                             |
| <i>Cd19-Cd3e</i>  | 130                             | 0                                    | 323                            | 0                                    |
| <i>Cd19-Cd68</i>  | 81                              | 3,26E-05                             | 229                            | 0                                    |
| <i>Cd19-Cd8b1</i> | 25                              | 2,35E-12                             | 37                             | 0                                    |
| <i>Cd19-Cxcr3</i> | 31                              | 1,34E-07                             | 70                             | 0                                    |
| <i>Cd19-Il12</i>  | 18                              | 5,74E-11                             | 67                             | 0                                    |
| <i>Cd19-RorgT</i> | 43                              | 0                                    | 106                            | 0                                    |
| <i>Cd19-Socs3</i> | 12                              | 9,06E-08                             | 21                             | 0                                    |
| <i>Cd19-Tnf</i>   | 27                              | 3,84E-05                             | 140                            | 0                                    |
| <i>Cd3e-Cd68</i>  | 100                             | 4,33E-05                             | 221                            | 1,22E-15                             |
| <i>Cd3e-Il12</i>  | 25                              | 5,55E-16                             | 32                             | 0                                    |
| <i>Cd68-iNos2</i> | 146                             | 2,33E-09                             | 286                            | 0                                    |
| <i>Ifng-iNos2</i> | 16                              | 3,07E-07                             | 22                             | 0                                    |

Example of the counts and p values of statistically significant sequence pairs ( $\chi^2$  test) at 10  $\mu\text{m}$  in 1 lymphoid region (RIL see Supplementary Figure 1) of 2 consecutive lung tissue sections at 12 wpi are here shown.

Supplementary Table 2

*cDNA primers*

| <b>name</b>       | <b>sequence</b>       |
|-------------------|-----------------------|
| mSoes3_prim_2     | CTGGAAGTGTCCCGGCCGGTC |
| mSoes3_prim_3_AP2 | CTCTCTTGGGGGTACTCCCG  |
| mSoes3_prim_4_AP3 | TGGGCTCCAAGATGGCTCAT  |
| mMpo_prim_2       | GTGTTGGTTAAACTGAGTG   |
| mMpo_prim_3       | AGTTGAGGCCAGTGAAGAAG  |
| mMpo_prim_4       | GTGCCAACTCCAGGTTCTTC  |
| mIl10_prim_2      | AGTGCTGAGCCAGGCATGAT  |
| mIl10_prim_3      | TCAAATTCATTCATGGCCTT  |
| mIl10_prim_4      | AAGACCCATGAGTTTCTTCA  |
| mIfng_prim_2      | AGGAGGAGAAGCCCAGAACT  |
| mIfng_prim_3      | TCCGGCAACAGCTGGTGGAC  |
| mIfng_prim_4      | CTCTTGAGACACTGCTTTCT  |
| mFoxp3_prim_2     | CATATACCAGGCACAGTGCC  |
| mFoxp3_prim_3     | GACCAGGCCGGGAGCACACT  |
| mFoxp3_prim_4     | GGCATTGCTTGAGGCTGCGT  |
| mCxcr3_prim_2     | CAGGGCGGGGAGTCAGAGAA  |
| mCxcr3_prim_3     | GGGGTCCCTGCGGTAGATCT  |
| mCxcr3_prim_4     | TGGTCAGAGCGGCCAGGCG   |
| mCd80_prim_2      | AAATGGAACAGAGTGTCTTT  |
| mCd80_prim_3      | ATATAAAGTCCGGTTCTTAT  |
| mCd80_prim_4      | GACGACGACTGTTATTACTG  |
| mCd19_prim_2      | CAGGAAGGGTGTGACTGGT   |
| mCd19_prim_3      | CCCGAGGGAGGCGTCACTTT  |
| mCd19_prim_4      | CCCTTGTGGGACACCATGGA  |
| mCcr6_prim_2      | AGAACTGTGAAGTTGTTTAC  |
| mCcr6_prim_3      | ACTGCCACACAGATGACCTT  |
| mCcr6_prim_4      | AGATGTAGCTTCCGAGTAA   |
| mCcr4_prim_2      | CTCCGGGTACCAGCAGGAGA  |
| mCcr4_prim_3      | GAAGAGTTGGGTGATGTACT  |
| mCcr4_prim_4      | ACTCCTGCCTCTGCCTCCAC  |
| mCd11b_prim_2     | GCCAGGTCCATCAAGCCATC  |

|               |                       |
|---------------|-----------------------|
| mCd11b_prim_3 | CCAGCATCCTTGTTTTTTAA  |
| mCd11b_prim_4 | TGTTTCACATTTCTGCATCA  |
| mCd3e_prim_2  | CAGGATGCCCCAGAAAGTGT  |
| mCd3e_prim_3  | AGTCTGGGTGGGAACAGGT   |
| mCd3e_prim_4  | AGGAGGTATGGGGTGTGTAA  |
| mF4/80_prim_2 | AAGAGGAGCAGCCAAAAGCC  |
| mF4/80_prim_3 | GAGCCTGGTACATTGGTGCA  |
| mF4/80_prim_4 | ACAGCAGGAAGGTGGCTATG  |
| mCd4_prim_2   | CTCGAGACTTTGCAAACAGG  |
| mCd4_prim_3   | GTATCTTGAGGGTGAGTGGG  |
| mCd4_prim_4   | TCTTGCAAATTCAAAAGAGA  |
| mCd8b1_prim_2 | CATCTTGGCGCTTTTGGGGA  |
| mCd8b1_prim_3 | CTGGGTCTCTGGGTGGGGGA  |
| mCd8b1_prim_4 | TCCAGGGTCCCGGCTAGCTC  |
| mCd8a_prim_2  | TGGGGGAGGCGGTAGGGTC   |
| mCd8a_prim_3  | CTAGCTCTGGTGTTACAGTC  |
| mCd8a_prim_4  | CAGAAAGAGCCTGGGAATCT  |
| mCd11c_prim_2 | CCAGGTACAGCTCATGACTG  |
| mCd11c_prim_3 | CTGATTCTCAATATCCTTCA  |
| mCd11c_prim_4 | TAGTTGGGTCTTGGGGCTTT  |
| mCd127_prim_2 | TATAGCGAAAGCTCTACCCA  |
| mCd127_prim_3 | TGAATCTGGCAGTCCAGGAA  |
| mCd127_prim_4 | GACAGGTTTCATGGCAAGAGA |
| mI17a_prim_2  | CAGATGAAGCTCTCCCTGGA  |
| mI17a_prim_3  | TGGGGGTTTCTTAGGGGTCA  |
| mI17a_prim_4  | AACATAAACTAAGTTTGGT   |
| miNos2_prim_2 | ATCTCTCCACTGCCCCAGTT  |
| miNos2_prim_3 | TCCAGGATGTTGTAGCGCTG  |
| miNos2_prim_4 | GTCTAAAGGCTCCGGGCTCT  |
| mTerg_prim_2  | GCAGGAAGTGCTCTGCAGGC  |
| mTerg_prim_3  | ATGACATCGGGAAAGAACTT  |
| mTerg_prim_4  | TTATGGCAGTGAGGATGAAA  |
| mRorgT_prim_2 | AGCTCCCGAGATGTCCGGTG  |
| mRorgT_prim_3 | ACTTCCTCTGGTAGCTGGTC  |
| mRorgT_prim_4 | TGTCAGTCTGTTTTTTATTT  |

|                 |                       |
|-----------------|-----------------------|
| mTerb_prim_2    | GGGTGCCTGCCGCAAAGTAG  |
| mTerb_prim_3    | TCCAGGGTCCCCGGCTAGCTC |
| mTerb_prim_4    | CTGGGTCTCTGGGTGGGGGA  |
| mI16_prim_3     | TCGTTCTTGGTGGGCTCCAG  |
| mI16_prim_4     | TTGTTCTTCATGTACTCCAG  |
| mI16_prim_5     | ACTTATACATTCCAAGAAAC  |
| mI112_prim_3    | GCAAGGGTGGCCAAAAAGAG  |
| mI112_prim_4    | TTGTCTAGAATGATCTGCTG  |
| mI112_prim_5    | GAGAGAAGCGATGGAGGGGA  |
| mCd68_prim_3    | TGCCTTCTCTTGGGAAGAGGA |
| mCd68_prim_4    | AGGATTCGGATTTGAATTTG  |
| mCd68_prim_5    | AGTGGACTGGGGCAGATGCT  |
| mTnf_prim_4     | TTTCTGTTCTCCCTCCTGGC  |
| mTnf_prim_5     | AAGAGAACCTGGGAGTAGAC  |
| mTnf_prim_6     | CATCTTGTGTTTCTGAGTAG  |
| mSCGB1A1_prim   | TATCTCTGAAATCCAGTGAG  |
| mSftpc_prim     | CAGGTCTCTCCCGGAAGAAT  |
| Cd69_prim1      | GTGCTTTTGTFTTCTTCCTT  |
| Cd69_prim2      | ATCCTTGATGTGATTAGCAG  |
| Cd69_prim3      | ATGTCTGATTAGCTTCATTT  |
| Cd40lg_prim1    | TCAGATTGTAAGTTCTTAGG  |
| Cd40lg_prim2    | CAGTCACGTTGACAAACACA  |
| Cd40lg_prim3    | CTTGAGTGTAGACATAATAG  |
| mCD86_ap1_prim  | CCAGATCTTAAGAGTCTGCA  |
| mCD86_ap2_prim  | CAAATATAACCACTCCCATCC |
| mCD86_ap3_prim  | CTGAAGTTGGCGATCACTGA  |
| mElane_ap1_prim | CATTATGGCTTCGGATAATG  |
| mElane_ap2_prim | TGGGCCACCTGCACGTTGGC  |
| mElane_ap3_prim | GCCAGAGTCCGGCTGGATAG  |
| mI112b_ap1_prim | GAGTGTGGCCATTGTGTCCT  |
| mI112b_ap2_prim | GGTTGTCAAAAAGCTAATG   |
| mI112b_ap3_prim | GCACGTGAACCGTCCGGAGT  |
| mTbx21_ap1_prim | AGTGATGCAAAACAGAAGAA  |
| mTbx21_ap2_prim | CCCTGTTCTCTGAGGATCC   |
| mTbx21_ap3_prim | GTCGGGTCTGTGCGCCCGG   |

|             |                      |
|-------------|----------------------|
| mCd4_5_prim | CTTGAGGTCTTTGGTGGACT |
| mCd4_6_prim | AGAAGGAGATCCAGGGCTGG |
| mCd4_7_prim | GAACCCTTAGGTTGGACATG |

Supplementary Table 3

*Padlock probes (all padlock probes are 5' phosphorylated)*

| <b>name</b> | <b>sequence</b>                                                                                        |
|-------------|--------------------------------------------------------------------------------------------------------|
| mSocs3_GGAG | TCCAACGTGGCCACCCTCTTCCTCTATGATTACTGACTGCGTCT<br>ATTTAGTGGAGCCGAGCTATCTTCTTTTACTGAGCCGACCTCTCTCC        |
| mMpo_GAGG   | CGATGACCCCTGCCTCCTCTTCCTCTATGATTACTGACTGCGTCT<br>ATTTAGTGGAGCCGAGGCTATCTTCTTTTGCCCTTTGACAGCCTGCA       |
| mIl10_CCGG  | GCTAACCGACTCCTTAATGCTTCCTCTATGATTACTGACTGCGT<br>CTATTTAGTGGAGCCCCGGCTATCTTCTTTGACCAGCTGGACAACATAC<br>T |
| mIfng_CACA  | GCTGTTTCTGGCTGTTACTGTTCCCTCTATGATTACTGACTGCGTC<br>TATTTAGTGGAGCCCACACTATCTTCTTTCTTTGCAGCTCTTCCTCATG    |
| mFoxp3_CAAC | CCTCCCACCACCTTCTGCTTTCCTCTATGATTACTGACTGCGTCT<br>ATTTAGTGGAGCCCAACCTATCTTCTTTGACAACCCAGCCATGATCAG      |
| mCxcr3_AGAA | GCCCTCTACAGCCTCCTCTTTTCCTCTATGATTACTGACTGCGTC<br>TATTTAGTGGAGCCAGAACTATCTTCTTTTGACAGAACCTTCCTGCCA      |
| mCd80_ACCA  | CCGGGGCACATACAGCTGTTTCCTCTATGATTACTGACTGCGTC<br>TATTTAGTGGAGCCACCACTATCTTCTTTCTGGGCTGGTCCCTTCAGA       |
| mCd19_ACAC  | GGACTCCTCACCTGTCTCTTTTCCTCTATGATTACTGACTGCGTC<br>TATTTAGTGGAGCCACACCTATCTTCTTTTGCTGCCATGCCTCCC         |
| mCcr6_AAGA  | GTTACTCATGCCACCAACTTCCTCTATGATTACTGACTGCGT<br>CTATTTAGTGGAGCCAAGACTATCTTCTTTACCCTACCGTTCTGGGCA         |
| mCcr4_AACC  | TTTGCTGTTTCGTCCTGTCCCTTCCTCTATGATTACTGACTGCGTC<br>TATTTAGTGGAGCCAACCCTATCTTCTTTCTGAACCTGGCCATCTCGGA    |
| mCd11b_AATT | AAACCCTAGCCCAAGATTCTCTATGATTACTGACTGCGTCTAT<br>TTAGTGGAGCCAATTCTATCTTCTTTACCTTCAATGACTTCAAGAG          |
| mCd3e_ACGT  | CACCCTGCTACTCCTTTCTCTATGATTACTGACTGCGTCTATTT<br>AGTGGAGCCACGTCTATCTTCTTTATCCAGCCCTCCGAG                |
| mF4/80_ACTG | TGTCTGCTCAACCGTTCCTCTATGATTACTGACTGCGTCTATTTA<br>GTGGAGCCACTGCTATCTTCTTTCTTTTCATCTTCCTCATTAC           |
| mCd4_AGTC   | TGCACCGTGACCCTGTCCTCTATGATTACTGACTGCGTCTATTTA<br>GTGGAGCCAGTCTATCTTCTTTTCAGCGACTTCTGGAAC               |
| mCd8b1_ATAT | GTTCAAACCAACCATACGTCCTCTATGATTACTGACTGCGTCTA<br>TTTAGTGGAGCCATACTATCTTCTTTCCCTTCGTCCTGCTG              |
| mCd8a_ATCG  | AAGTGAACCTACTACTACCTCCTCTATGATTACTGACTGCGTC<br>TATTTAGTGGAGCCATCGCTATCTTCTTTGTGCCAGTCCTTCAGA           |
| mCd11c_ATGC | CTGCCACCAACCCTTTTCCTCTATGATTACTGACTGCGTCTATTTA<br>GTGGAGCCATGCCTATCTTCTTTGCCGTGCCCTTGCTG               |
| mCd127_ATTA | CTTCTCTATTCTTTCTCTTTCCTCTATGATTACTGACTGCGTCTA<br>TTTAGTGGAGCCATTACTATCTTCTTTTCACATACAAGCGTGCTT         |
| mIl17a_CATG | AGGCAGCCTAAACAGATCCTCTATGATTACTGACTGCGTCTATT                                                           |



|                       |                                                                                                            |
|-----------------------|------------------------------------------------------------------------------------------------------------|
|                       | TAGTGGAGCCCATGCTATCTTCTTTCCCTCGATTGTCCGCC                                                                  |
| miNos2_GACT           | AAGGCCACATCGGATTTCCCTCTATGATTACTGACTGCGTCTATT<br>TAGTGGAGCCGACTCTATCTTCTTTTCATGACACTCTTACCAC               |
| mTerg_GCCG            | GACCTACCTTTGTCTCCTTCCCTCTATGATTACTGACTGCGTCTAT<br>TTAGTGGAGCCGCCGCTATCTTCTTTAAATCTCCATAAGGCTGG             |
| mRorgT_GCGC           | TCCCTTTCTGCACTCTATTCCCTCTATGATTACTGACTGCGTCTAT<br>TTAGTGGAGCCGCGCCTATCTTCTTTCCCTCACCAGCCTT                 |
| mTcrb_GTAC            | GTCTTGTCTGCCACCATCCTCTATGATTACTGACTGCGTCTATTT<br>AGTGGAGCCGTACCTATCTTCTTTACATCCTATCAACAAGGG                |
| mActb_GCAT            | TTACACCTTTCTTTGACAATCCGAGTAGTCTTTGTGCGTCTATT<br>TAGTGGAGCCGCATCTATCTTCTTTGACTGTTACTGAGCTGCGTT              |
| mI16_CGAT_1           | CTCTACGAAGAACTGACAATTCCTCTATGATTACTGACTGCGTC<br>TATTTAGTGGAGCCCGATCTATCTTCTTTGGTATCTGACTTATGTTGTT          |
| mI16_CGAT_2           | GCTCTCCTAACAGATAAGCTTCCCTCTATGATTACTGACTGCGTC<br>TATTTAGTGGAGCCCGATCTATCTTCTTTTCCCTACCCCAATTTCCAAT         |
| mI12_CAGT_1           | TGACACCTTTGCTGATTTCTTCCCTCTATGATTACTGACTGCGTCT<br>ATTTAGTGGAGCCAGTCTATCTTCTTTTCCAGTTTCCCTAAGTTCATCA        |
| mI12_CAGT_2           | TCTCCCTCAAGTTCCTTTGTTTCCCTCTATGATTACTGACTGCGTCT<br>ATTTAGTGGAGCCAGTCTATCTTCTTTGCACTCCCCATTCTACT            |
| 1<br>mCd68_AGCT_      | CTGTCTCTCATTCCCTTATCCTCTATGATTACTGACTGCGTCT<br>ATTTAGTGGAGCCAGTCTATCTTCTTTGACGGTACCCATCCCCAC               |
| 2<br>mCd68_AGCT_      | TCCTTACGATGACACCTTCCCTCTATGATTACTGACTGCGTCTAT<br>TTAGTGGAGCCAGTCTATCTTCTTTGCCGTTACTCTCTGCCA                |
| mTnf_CCAA_3           | ATGGCCAGACCTCACACTTCCCTCTATGATTACTGACTGCGTC<br>TATTTAGTGGAGCCCAACTATCTTCTTTGCCTCCCTCTCATCAGTCT             |
| 2_AP1<br>mSocs3_GGAG_ | GACCGGCCGGGCAGTTCAGTCTACGATTTTACCAGTGGCTTTT<br>GCGTCTATTTAGTGGAGCCGGAGCTATCTTCTTTGTGACTAAACATTAC<br>AAGAA  |
| 3_AP2<br>mSocs3_GGAG_ | CGGGAGTACCCCAAGAGAGCTGATTCCTTTGACTCACATTTT<br>GCGTCTATTTAGTGGAGCCGGAGCTATCTTCTTTCCACCTGCCAGGCA<br>CTCCC    |
| 4_AP3<br>mSocs3_GGAG_ | ATGAGCCATCTTGGAGCCCATCTACGAGTTTGCAGTCACGTTTT<br>GCGTCTATTTAGTGGAGCCGGAGCTATCTTCTTTGAAGGGAGGCAGATC<br>AACAG |
| _AP1<br>mMpo_GAGG_2   | CACTCAGTTTAACCAACTCTACGATTTTACCAGTGGCTTTTG<br>CGTCTATTTAGTGGAGCCGAGGCTATCTTCTTTGTTCTTTCAAAGGATTT<br>GGG    |
| _AP2<br>mMpo_GAGG_3   | CTTCTTCACTGGCCTCAACTCTGATTCCTTTGACTCACATTTT<br>CGTCTATTTAGTGGAGCCGAGGCTATCTTCTTTGAGCCAGCTACCCGGTT<br>CTC   |
| _AP3<br>mMpo_GAGG_4   | GAAGAACCTGGAGTTGGCACTCTACGAGTTTGCAGTCACGTTTT<br>GCGTCTATTTAGTGGAGCCGAGGCTATCTTCTTTGGTGAGCTCGGCACG<br>GTGCT |
| _AP1<br>mI10_CCGG_2   | ATCATGCCTGGCTCAGCACTTCTACGATTTTACCAGTGGCTTTT<br>GCGTCTATTTAGTGGAGCCCGGCTATCTTCTTTCTTGCAGAAAAGAGA<br>GCTCC  |
| _AP2<br>mI10_CCGG_3   | AAGGCCATGAATGAATTTGACTGATTCCTTTGACTCACATTTT<br>GCGTCTATTTAGTGGAGCCCGGCTATCTTCTTTTCCAAGACCAAGGTGT<br>CTAC   |
| _AP3<br>mI10_CCGG_4   | TGAAGAACTCATGGGTCTTTCTACGAGTTTGCAGTCACGTTTT<br>GCGTCTATTTAGTGGAGCCCGGCTATCTTCTTTTCCAGAGCTCCTAAGAG          |

|                       |                                                                                                             |
|-----------------------|-------------------------------------------------------------------------------------------------------------|
|                       | AGTTG                                                                                                       |
| mIfng_CACA_2<br>_AP1  | AGTTCTGGGCTTCTCCTCCTTCTACGATTTTACCAGTGGCTTTTG<br>CGTCTATTTAGTGGAGCCACACTATCTTCTTTACCCTCTGACTTGAGAC<br>AGA   |
| mIfng_CACA_3<br>_AP2  | GTCCACCAGCTGTTGCCGGACTGATTCCTTTGACTCACATTTTTG<br>CGTCTATTTAGTGGAGCCACACTATCTTCTTTTCAATGAGCTCATCCGA<br>GTG   |
| mIfng_CACA_4<br>_AP3  | AGAAAGCAGTGTCTCAAGAGTCTACGAGTTTGCAGTCACGTTTT<br>GCGTCTATTTAGTGGAGCCACACTATCTTCTTTAGTAACAGGCTGTCCC<br>TGAA   |
| mFoxp3_CAAC<br>_2_AP1 | GGCACTGTGCCTGGTATATGTCTACGATTTTACCAGTGGCTTTT<br>GCGTCTATTTAGTGGAGCCCAACCTATCTTCTTTCTCTGCAGGTTTAGTG<br>CTGT  |
| mFoxp3_CAAC<br>_3_AP2 | AGTGTGCTCCCGGCCCTGGTCCTGATTCCTTTGACTCACATTTTTG<br>CGTCTATTTAGTGGAGCCCAACCTATCTTCTTTTAGCCACCAGTACTCAG<br>GGC |
| mFoxp3_CAAC<br>_4_AP3 | ACGCAGCCTCAAGCAATGCCTCTACGAGTTTGCAGTCACGTTTT<br>GCGTCTATTTAGTGGAGCCCAACCTATCTTCTTTACACAGGCATAACTG<br>ATCAT  |
| mCxcr3_AGAA<br>_2_AP1 | TTCTCTGACTCCCCGCCCTGTCTACGATTTTACCAGTGGCTTTTG<br>CGTCTATTTAGTGGAGCCAGAACTATCTTCTTTATGGGGAAAACGAGAG<br>CGAC  |
| mCxcr3_AGAA<br>_3_AP2 | AGATCTACCGCAGGGACCCCTGATTCCTTTGACTCACATTTTT<br>GCGTCTATTTAGTGGAGCCAGAACTATCTTCTTTGAGCATAGTGCACGC<br>CACCC   |
| mCxcr3_AGAA<br>_4_AP3 | CGCCTGGGCCGCTCTGACCATCTACGAGTTTGCAGTCACGTTTT<br>GCGTCTATTTAGTGGAGCCAGAACTATCTTCTTTAAATGTGGATGTTGTT<br>CACG  |
| mCd80_ACCA_<br>2_AP1  | AAAGACACTCTGTTCCATTTTCTACGATTTTACCAGTGGCTTTTG<br>CGTCTATTTAGTGGAGCCACCACTATCTTCTTTGGTTGTGAAACTCAACC<br>TTC  |
| mCd80_ACCA_<br>3_AP2  | ATAAGAACCGGACTTTATATCTGATTCCTTTGACTCACATTTTTG<br>CGTCTATTTAGTGGAGCCACCACTATCTTCTTTACTAAAAGTGTGGCCCC<br>AGT  |
| mCd80_ACCA_<br>4_AP3  | CAGTAATAACAGTCGTCGCTCTACGAGTTTGCAGTCACGTTTT<br>GCGTCTATTTAGTGGAGCCACCACTATCTTCTTTCTTTGGGGCAGGATTC<br>GGCG   |
| mCd19_ACAC_<br>2_AP1  | ACCAGTCAACACCCTCCTGTCTACGATTTTACCAGTGGCTTTT<br>GCGTCTATTTAGTGGAGCCACACCTATCTTCTTTGCTGGCTTGGTATCGA<br>GGTA   |
| mCd19_ACAC_<br>3_AP2  | AAAGTGACGCCTCCCTCGGGCTGATTCCTTTGACTCACATTTTT<br>GCGTCTATTTAGTGGAGCCACACCTATCTTCTTTACCCCGCCAGGAGATT<br>CTTC  |
| mCd19_ACAC_<br>4_AP3  | TCCATGGTGTCCCACAAGGGTCTACGAGTTTGCAGTCACGTTTT<br>GCGTCTATTTAGTGGAGCCACACCTATCTTCTTTAATATGTCCAGCCGCT<br>ACAT  |
| mCcr6_AAGA_<br>2_AP1  | GTGAACAACCTTACAGTTCCTTCTACGATTTTACCAGTGGCTTTT<br>GCGTCTATTTAGTGGAGCCAAGACTATCTTCTTTTGCTTCTTGCCACCG<br>AGGT  |
| mCcr6_AAGA_<br>3_AP2  | AAGGTCATCTGTGTGGCAGTCTGATTCCTTTGACTCACATTTTTG<br>CGTCTATTTAGTGGAGCCAAGACTATCTTCTTTCCAGAACACTGACGCA<br>CAGT  |

|        |              |                                                                                                            |
|--------|--------------|------------------------------------------------------------------------------------------------------------|
| 4_AP3  | mCcr6_AAGA_  | TTACTCGGAAAGCTACATCTTCTACGAGTTTGCAGTCACGTTTT<br>GCGTCTATTTAGTGGAGCCAAGACTATCTTCTTTGGCTTCTCTGTGCC<br>GGGT   |
| _AP1   | mCcr4_AACC_2 | TCTCCTGCTGGTACCCGGAGTCTACGATTTTACCAGTGGCTTTT<br>GCGTCTATTTAGTGGAGCCAACCCTATCTTCTTTCTCAACTGTTCTCATT<br>GGCT |
| _AP2   | mCcr4_AACC_3 | AGTACATCACCCAACCTCTTCTGATTCCTTTGACTCACATTTTTG<br>CGTCTATTTAGTGGAGCCAACCCTATCTTCTTTTCTCGGGGAGAAATTCC<br>GCA |
| _AP3   | mCcr4_AACC_4 | GTGGAGGCAGAGGCAGGAGTTCTACGAGTTTGCAGTCACGTTT<br>TGCCTCTATTTAGTGGAGCCAACCCTATCTTCTTTGTTATTGGGTATTGG<br>GCATG |
| _2_AP1 | mCd11b_AATT  | GATGGCTTGATGGACCTGGCTCTACGATTTTACCAGTGGCTTTT<br>GCGTCTATTTAGTGGAGCCAATTCTATCTTCTTTGGGGTAAGGATCTCAC<br>AATG |
| _3_AP2 | mCd11b_AATT  | TTAAAAACAAGGATGCTGGCTGATTCCTTTGACTCACATTTTT<br>GCGTCTATTTAGTGGAGCCAATTCTATCTTCTTTTGCATGTCAAGAACA<br>AGTA   |
| _4_AP3 | mCd11b_AATT  | TGATGCAGAAATGTGAAACATCTACGAGTTTGCAGTCACGTTTT<br>GCGTCTATTTAGTGGAGCCAATTCTATCTTCTTTGCGCACCCAGGTCTTT<br>GGAT |
| 2_AP1  | mCd3e_ACGT_  | ACACTTTCTGGGGCATCCTGTCTACGATTTTACCAGTGGCTTTTG<br>CGTCTATTTAGTGGAGCCACGTCTATCTTCTTTTCTGAGAGGATGCGGT<br>GGA  |
| 3_AP2  | mCd3e_ACGT_  | ACCTGTTCCCAACCCAGACTCTGATTCCTTTGACTCACATTTTTG<br>CGTCTATTTAGTGGAGCCACGTCTATCTTCTTTCAAACAAGGAGCGGC<br>CACC  |
| 4_AP3  | mCd3e_ACGT_  | TTACACACCCATACCTCCTTCTACGAGTTTGCAGTCACGTTTTG<br>CGTCTATTTAGTGGAGCCACGTCTATCTTCTTTCCCGGCCATCCTCCGA<br>CTG   |
| 2_AP1  | mF4/80_ACTG_ | GGCTTTTGGCTGCTCCTCTTTCTACGATTTTACCAGTGGCTTTTG<br>CGTCTATTTAGTGGAGCCACTGCTATCTTCTTTACTGCCACAGTACGATG<br>TGG |
| 3_AP2  | mF4/80_ACTG_ | TGCACCAATGTACCAGGCTCCTGATTCCTTTGACTCACATTTTTG<br>CGTCTATTTAGTGGAGCCACTGCTATCTTCTTTAATGTGGACTGAATTCT<br>GTC |
| 4_AP3  | mF4/80_ACTG_ | CATAGCCACCTTCTGCTGTTCTACGAGTTTGCAGTCACGTTTTG<br>CGTCTATTTAGTGGAGCCACTGCTATCTTCTTTCTGGTATGTCTTGCCTT<br>GGC  |
| _AP1   | mCd4_AGTC_2  | CCTGTTTGCAAAGTCTCGAGTCTACGATTTTACCAGTGGCTTTT<br>GCGTCTATTTAGTGGAGCCAGTCCTATCTTCTTTACTCTCTTCTTCACTA<br>GGTA |
| _AP2   | mCd4_AGTC_3  | CCCACTCACCTCAAGATACCTGATTCCTTTGACTCACATTTTTG<br>CGTCTATTTAGTGGAGCCAGTCCTATCTTCTTTCTCCAGCTGAAGGAAAC<br>GCT  |
| _AP3   | mCd4_AGTC_4  | TCTCTTTTGAATTTGCAAGATCTACGAGTTTGCAGTCACGTTTTG<br>CGTCTATTTAGTGGAGCCAGTCCTATCTTCTTTAGCTTCCCATGATGCCT<br>GCT |
| _2_AP1 | mCd8b1_ATAT  | TCCCCAAAAGCGCCAAGATGTCTACGATTTTACCAGTGGCTTTT<br>GCGTCTATTTAGTGGAGCCATATCTATCTTCTTTGAGCACTGAGGGGAA<br>CAGTG |
| _3_AP2 | mCd8b1_ATAT  | TCCCCACCCAGAGACCCAGCTGATTCCTTTGACTCACATTTTT<br>GCGTCTATTTAGTGGAGCCATATCTATCTTCTTTGAAGAAGAAGCAATG           |

|                   |                                                                                                             |
|-------------------|-------------------------------------------------------------------------------------------------------------|
|                   | CCCGT                                                                                                       |
| mCd8b1_ATAT_4_AP3 | GAGCTAGCCGGGACCCTGGATCTACGAGTTTGCAGTCACGTTTT<br>GCGTCTATTTAGTGGAGCCATATCTATCTTCTTTCTTTGGCCTTTCATGG<br>AAAA  |
| mCd8a_ATCG_2_AP1  | GACCCTACACGCTCCCCATCTACGATTTTACCAGTGGCTTTT<br>GCGTCTATTTAGTGGAGCCATCGCTATCTTCTTTGCTAAAGGAGCAGTTT<br>CCCC    |
| mCd8a_ATCG_3_AP2  | GACTGTAACACCAGAGCTAGCTGATTCCTTTGACTCACATTTTT<br>GCGTCTATTTAGTGGAGCCATCGCTATCTTCTTTTACAATGGGAGTAATG<br>AGCA  |
| mCd8a_ATCG_4_AP3  | AGATTCCCAGGCTCTTTCTGTCTACGAGTTTGCAGTCACGTTTTG<br>CGTCTATTTAGTGGAGCCATCGCTATCTTCTTTTAAAGATTTTATCTCA<br>GTG   |
| mCd11c_ATGC_2_AP1 | CAGTCATGAGCTGTACCTGGTCTACGATTTTACCAGTGGCTTTT<br>GCGTCTATTTAGTGGAGCCATGCCTATCTTCTTTCAGAGCCTGCTTCTGT<br>TCTC  |
| mCd11c_ATGC_3_AP2 | TGAAGGATATTGAGAATCAGCTGATTCCTTTGACTCACATTTTT<br>GCGTCTATTTAGTGGAGCCATGCCTATCTTCTTTCGTGGAGAACTTTGAT<br>GCTT  |
| mCd11c_ATGC_4_AP3 | AAAGCCCCAAGACCCAACTATCTACGAGTTTGCAGTCACGTTTT<br>GCGTCTATTTAGTGGAGCCATGCCTATCTTCTTTTGTCTGCCTTCATATT<br>CATG  |
| mCd127_ATTA_2_AP1 | TGGGTAGAGCTTTCGCTATATCTACGATTTTACCAGTGGCTTTT<br>GCGTCTATTTAGTGGAGCCATTACTATCTTCTTCTCTCAGAATGATG<br>GCTC     |
| mCd127_ATTA_3_AP2 | TTCCTGGACTGCCAGATTCACTGATTCCTTTGACTCACATTTTTG<br>CGTCTATTTAGTGGAGCCATTACTATCTTCTTTGAGTTTCAATCCCGAA<br>AGT   |
| mCd127_ATTA_4_AP3 | TCTCTTGCCATGAACCTGTCTCTACGAGTTTGCAGTCACGTTTTG<br>CGTCTATTTAGTGGAGCCATTACTATCTTCTTTACACATTCCAACCTCAA<br>CCC  |
| mI17a_CATG_2_AP1  | TCCAGGGAGAGCTTCATCTGTCTACGATTTTACCAGTGGCTTTT<br>GCGTCTATTTAGTGGAGCCCATGCTATCTTCTTTTCAGGACGCGCAAAC<br>ATGAG  |
| mI17a_CATG_3_AP2  | TGACCCTAAGAAACCCCCACTGATTCCTTTGACTCACATTTTT<br>GCGTCTATTTAGTGGAGCCCATGCTATCTTCTTTCCTAAACAGAGACCC<br>GCGGC   |
| mI17a_CATG_4_AP3  | ACCAACTTAGTTTTATGTTTCTACGAGTTTGCAGTCACGTTTTG<br>CGTCTATTTAGTGGAGCCCATGCTATCTTCTTCTCTCTGAATGGGGTG<br>AAA     |
| miNos2_GACT_2_AP1 | AACTGGGGCAGTGGAGAGATTCTACGATTTTACCAGTGGCTTTT<br>GCGTCTATTTAGTGGAGCCGACTCTATCTTCTTTCACAGTATGTGAGGAT<br>CAAA  |
| miNos2_GACT_3_AP2 | CAGCGCTACAACATCCTGGACTGATTCCTTTGACTCACATTTTT<br>GCGTCTATTTAGTGGAGCCGACTCTATCTTCTTTTTTCGAGACTTCTGTGA<br>CACA |
| miNos2_GACT_4_AP3 | AGAGCCCGGAGCCTTTAGACTCTACGAGTTTGCAGTCACGTTTT<br>GCGTCTATTTAGTGGAGCCGACTCTATCTTCTTACAGCAATATAGGCTC<br>ATCC   |
| mTerg_GCCG_2_AP1  | GCCTGCAGAGCACTTCCTGCTCTACGATTTTACCAGTGGCTTTT<br>GCGTCTATTTAGTGGAGCCCGCTATCTTCTTTGCTGGTGACCTGAAAT<br>TCCA    |

|                       |                                                                                                               |
|-----------------------|---------------------------------------------------------------------------------------------------------------|
| mTerg_GCCG_3<br>_AP2  | AAGTTCTTTCCCGATGTCATCTGATTCCCTTTGACTCACATTTTTG<br>CGTCTATTTAGTGGAGCCGCCGCTATCTTCTTTTCATACCTTTGTCTCCT<br>GAA   |
| mTerg_GCCG_4<br>_AP3  | TTTCATCCTCACTGCCATAATCTACGAGTTTGCAGTCACGTTTTG<br>CGTCTATTTAGTGGAGCCGCCGCTATCTTCTTTGGTACAGCAAGTCAGCT<br>GGA    |
| mRorgT_GCGC<br>_2_AP1 | CACCGGACATCTCGGGAGCTTCTACGATTTTACCAGTGGCTTTT<br>GCGTCTATTTAGTGGAGCCGCCCTATCTTCTTTACAGGGCCCCACAGA<br>GACAC     |
| mRorgT_GCGC<br>_3_AP2 | GACCAGCTACCAGAGGAAGTCTGATTCCCTTTGACTCACATTTTT<br>GCGTCTATTTAGTGGAGCCGCCCTATCTTCTTTCTCTTTTCACGGGAGG<br>AGGT    |
| mRorgT_GCGC<br>_4_AP3 | AAATAAAAAACAGACTGACATCTACGAGTTTGCAGTCACGTTTT<br>GCGTCTATTTAGTGGAGCCGCCCTATCTTCTTTAGAGATAGGATGACC<br>AAGTC     |
| mTcrb_GTAC_2<br>_AP1  | CTACTTTGCGGCAGGCACCCTCTACGATTTTACCAGTGGCTTTT<br>GCGTCTATTTAGTGGAGCCGTACCTATCTTCTTTAGTCCGGTGAATTCGC<br>CCCT    |
| mTcrb_GTAC_3<br>_AP2  | AAGTTCTTTCCCGATGTCATCTGATTCCCTTTGACTCACATTTTTG<br>CGTCTATTTAGTGGAGCCGTACCTATCTTCTTTTCATACCTTTGTCTCCTTG<br>AA  |
| mTcrb_GTAC_4<br>_AP3  | TTTCATCCTCACTGCCATAATCTACGAGTTTGCAGTCACGTTTTG<br>CGTCTATTTAGTGGAGCCGTACCTATCTTCTTTGGTACAGCAAGTCAGCT<br>GGA    |
| mll6_CGAT_3_<br>AP1   | CTGGAGCCCACCAAGAACGATCTACGATTTTACCAGTGGCTTTT<br>GCGTCTATTTAGTGGAGCCCAGTCTATCTTCTTTTGTCTGTAGCTCATT<br>TGCT     |
| mll6_CGAT_4_<br>AP2   | CTGGAGTACATGAAGAACAACACTGATTCCCTTTGACTCACATTTTT<br>GCGTCTATTTAGTGGAGCCCAGTCTATCTTCTTTTTCTGGAGTACCATAG<br>CTAC |
| mll6_CGAT_5_<br>AP3   | GTTTCTTGAATGTATAAGTTCTACGAGTTTGCAGTCACGTTTT<br>GCGTCTATTTAGTGGAGCCCAGTCTATCTTCTTTTTCTGTTACCTAGCCA<br>GATG     |
| mll12_CAGT_3<br>_AP1  | CTCTTTTTGGCCACCCTTGCTCTACGATTTTACCAGTGGCTTTTG<br>CGTCTATTTAGTGGAGCCCAGTCTATCTTCTTTTGTGTCATCAGCTAC<br>CTC      |
| mll12_CAGT_4<br>_AP2  | CAGCAGATCATTCTAGACAACACTGATTCCCTTTGACTCACATTTTT<br>GCGTCTATTTAGTGGAGCCCAGTCTATCTTCTTTCACTTCAGAATCACAA<br>CCAT |
| mll12_CAGT_5<br>_AP3  | TCCCCTCCATCGCTTCTCTCTACGAGTTTGCAGTCACGTTTTG<br>CGTCTATTTAGTGGAGCCCAGTCTATCTTCTTTGCACAGCTACCTCAGCA<br>TGG      |
| mCd68_AGCT_<br>3_AP1  | TCCTCTTCCAAGAGAAGGCATCTACGATTTTACCAGTGGCTTTT<br>GCGTCTATTTAGTGGAGCCAGCTCTATCTTCTTTGGGAAGTGAGGCTTTT<br>CATT    |
| mCd68_AGCT_<br>4_AP2  | CAAATTCAAATCCGAATCCTCTGATTCCCTTTGACTCACATTTTTG<br>CGTCTATTTAGTGGAGCCAGCTCTATCTTCTTTCTTGTGTTACAGCTCCAA<br>GCC  |
| mCd68_AGCT_<br>5_AP3  | AGCATCTGCCCCAGTCCACTTCTACGAGTTTGCAGTCACGTTTT<br>GCGTCTATTTAGTGGAGCCAGCTCTATCTTCTTTTCAACCTACCAGCCCC<br>TCTG    |
| mTnf_CCAA_4<br>AP1    | GCCAGGAGGGAGAACAGAAATCTACGATTTTACCAGTGGCTTT<br>TGCCTCTATTTAGTGGAGCCCCAACTATCTTCTTTGCGAGGACAGCAAG              |

|                     |                                                                                                              |
|---------------------|--------------------------------------------------------------------------------------------------------------|
|                     | GGACTA                                                                                                       |
| mTnf_CCAA_5_ AP2    | GTCTACTCCCAGGTTCTCTTCTGATTCCCTTTGACTCACATTTTTG<br>CGTCTATTTAGTGGAGCCCCAACTATCTTCTTTTCAGCCGATGGGTTGTAC<br>CTT |
| mTnf_CCAA_6_ AP3    | CTACTCAGAAACACAAGATGTCTACGAGTTTGCAGTCACGTTTT<br>GCGTCTATTTAGTGGAGCCCCAACTATCTTCTTTGTGCTCAGAGCTTTCA<br>ACAA   |
| mCd40L_CGTA_1_ AP1  | CCTAAGAACTTACAATCTGATCTACGATTTTACCAGTGGCTTTT<br>GCGTCTATTTAGTGGAGCCCCTACTATCTTCTTTAATCCCAAGGGACCCT<br>GCTC   |
| mCd40L_CGTA_2_ AP2  | TGTGTTTGTCAACGTGACTGCTGATTCCCTTTGACTCACATTTTTG<br>CGTCTATTTAGTGGAGCCCCTACTATCTTCTTTGAATTACAAGCTGGTGC<br>TTC  |
| mCd40L_CGTA_3_ AP3  | CTATTATGTCTACACTCAAGTCTACGAGTTTGCAGTCACGTTTT<br>GCGTCTATTTAGTGGAGCCCCTACTATCTTCTTTACGGTTAAAAGAGAA<br>GGACT   |
| mCd69_CTAG_1_ AP1   | AAGGAAGAAAACAAAAGCACTCTACGATTTTACCAGTGGCTTT<br>TGCCTATTTAGTGGAGCCCTAGCTATCTTCTTTAAACCTCTGTAGCGT<br>ATTTC     |
| mCd69_CTAG_2_ AP2   | CTGCTAATCACATCAAGGATCTGATTCCCTTTGACTCACATTTTTG<br>CGTCTATTTAGTGGAGCCCTAGCTATCTTCTTTCTGAAACTGTCACCAAC<br>TGA  |
| mCd69_CTAG_3_ AP3   | AAATGAAGCTAATCAGACATTCTACGAGTTTGCAGTCACGTTTT<br>GCGTCTATTTAGTGGAGCCCTAGCTATCTTCTTTGAACATTGGATTGGGC<br>TGAA   |
| mSCGB1A1_GG CC_ AP4 | CTCACTGGATTTTCAGAGATATGCTTGTGGTAGCAAATATTTTGC<br>GTCTATTTAGTGGAGCCCGCCCTATCTTCTTTAAGCAAGATTTAAGATTC<br>TGAAG |
| mSftpc_CGCG_ AP4    | ATTCTTCCGGGAGAGACCTGTGCTTGTGGTAGCAAATATTTTGC<br>GTCTATTTAGTGGAGCCCGCCTATCTTCTTTTGATACTGGTTCCGAGTC<br>CG      |
| mCD86_CTGA_ ap1     | TGCAGACTCTTAAGATCTGGTCTACGATTTTACCAGTGGCTTTT<br>GCGTCTATTTAGTGGAGCCCTGACTATCTTCTTTGTCCATCTTGATTCAC<br>CCTG   |
| mCD86_CTGA_ ap2     | GGATGGGAGTGGTATATTTGCTGATTCCCTTTGACTCACATTTTT<br>GCGTCTATTTAGTGGAGCCCTGACTATCTTCTTTGACAGCTACCTCTTCA<br>GTCA  |
| mCD86_CTGA_ ap3     | TCAGTGATCGCCAACTTCAGTCTACGAGTTTGCAGTCACGTTTT<br>GCGTCTATTTAGTGGAGCCCTGACTATCTTCTTTAACAGACATTAACAG<br>AACTG   |
| mElane_GATC_ ap1    | CATTATCCGAAGCCATAATGTCTACGATTTTACCAGTGGCTTTT<br>GCGTCTATTTAGTGGAGCCGATCCTATCTTCTTTTTTGCAGATTGGATCA<br>ATTC   |
| mElane_GATC_ ap2    | GCCAACGTGCAGGTGGCCCACTGATTCCCTTTGACTCACATTTTT<br>GCGTCTATTTAGTGGAGCCGATCCTATCTTCTTTATGGCTCCGCTACCAT<br>TAAC  |
| mElane_GATC_ ap3    | CTATCCAGCCGGACTCTGGCTCTACGAGTTTGCAGTCACGTTTT<br>GCGTCTATTTAGTGGAGCCGATCCTATCTTCTTTCCACCATGGCCCTTGG<br>CAGA   |
| mI12b_GCTA_a p1     | AGGACACAATGGCCACACTCTCTACGATTTTACCAGTGGCTTTT<br>GCGTCTATTTAGTGGAGCCGCTACTATCTTCTTTGAAGATACTACGGCTA<br>CCTC   |

|      |               |                                                                                                            |
|------|---------------|------------------------------------------------------------------------------------------------------------|
| p2   | mll12b_GCTA_a | CATTAGCTTTTGTGACAACCCTGATTCCTTTGACTCACATTTTTG<br>CGTCTATTTAGTGGAGCCGCTACTATCTTCTTTCAATCAGGGCTGCGTAG<br>GTA |
| p3   | mll12b_GCTA_a | ACTCCGGACGGTTCACGTGCTCTACGAGTTTGAGTCACGTTTT<br>GCGTCTATTTAGTGGAGCCGCTACTATCTTCTTTGAAGTGTGAAGCACC<br>AAATT  |
| _ap1 | mTbx21_GTCA   | TTCTTCTGTTTTGCATCACTTCTACGATTTTACCAGTGGCTTTTG<br>CGTCTATTTAGTGGAGCCGCTACTATCTTCTTTAGAGTGGTGTCTGGATG<br>TAT |
| _ap2 | mTbx21_GTCA   | GGATCCTCAGAGGAACAGGGCTGATTCCTTTGACTCACATTTTT<br>GCGTCTATTTAGTGGAGCCGCTACTATCTTCTTTGCCATGGACCCGGG<br>CCTG   |
| _ap3 | mTbx21_GTCA   | CCGGGCGCACAGGACCCGACTCTACGAGTTTGCAGTCACGTTTT<br>GCGTCTATTTAGTGGAGCCGCTACTATCTTCTTTATCGTTTCTTCTATCCC<br>GAG |
| _AP1 | mCd4_AGTC_5   | AGTCCACCAAAGACCTCAAGTCTACGATTTTACCAGTGGCTTTT<br>GCGTCTATTTAGTGGAGCCAGTCCTATCTTCTTTCAAAGAGGTGTCCGTA<br>CAAA |
| _AP2 | mCd4_AGTC_6   | CCAGCCCTGGATCTCCTTCTCTGATTCCTTTGACTCACATTTTTG<br>CGTCTATTTAGTGGAGCCAGTCCTATCTTCTTTGCAGAGAAGGATTCTTT<br>CTT |
| _AP3 | mCd4_AGTC_7   | CATGTCCAACCTAAGGGTTCTCTACGAGTTTGCAGTCACGTTTT<br>GCGTCTATTTAGTGGAGCCAGTCCTATCTTCTTTAGTGGTTCCAAAGTTC<br>TCTC |

Supplementary Table 4

*Sequencing-by-ligation oligonucleotides*

| <b>name</b>                       | <b>sequence</b>                     | <b>5' modification</b> | <b>3' modification</b> |
|-----------------------------------|-------------------------------------|------------------------|------------------------|
| Anchor oligo<br>B2_DO_27_U_5AF750 | /5Alex750N/UGCGUCUAU<br>UUAGUGGAGCC | Alexa Fluor 750        | -                      |
| Cy5_0A_4N                         | ANNNCTATC                           | Phosphorylation        | Cy5                    |
| Cy3_0G_4N                         | GNNNCTATC                           | Phosphorylation        | Cy3                    |
| TR_0C_4N                          | CNNNCTATC                           | Phosphorylation        | Texas Red              |
| AF488_0T_4N                       | TNNNCTATC                           | Phosphorylation        | Alexa Fluor 488        |
| Cy5_1A_4N                         | NANNCTATC                           | Phosphorylation        | Cy5                    |
| Cy3_1G_4N                         | NGNNCTATC                           | Phosphorylation        | Cy3                    |
| TR_1C_4N                          | NCNNCTATC                           | Phosphorylation        | Texas Red              |
| AF488_1T_4N                       | NTNNCTATC                           | Phosphorylation        | Alexa Fluor 488        |
| Cy5_2A_4N                         | NNANCTATC                           | Phosphorylation        | Cy5                    |
| Cy3_2G_4N                         | NNGNCTATC                           | Phosphorylation        | Cy3                    |
| TR_2C_4N                          | NNCNCTATC                           | Phosphorylation        | Texas Red              |
| AF488_2T_4N                       | NNTNCTATC                           | Phosphorylation        | Alexa Fluor 488        |
| Cy5_3A_4N                         | NNNACTATC                           | Phosphorylation        | Cy5                    |
| Cy3_3G_4N                         | NNNGCTATC                           | Phosphorylation        | Cy3                    |
| TR_3C_4N                          | NNNCCTATC                           | Phosphorylation        | Texas Red              |
| AF488_3T_4N                       | NNNTCTATC                           | Phosphorylation        | Alexa Fluor 488        |
